1 **Title: Shape analysis of gamma rhythm supports a superlinear inhibitory**  
2 **regime in an inhibition-stabilized network**

3

4 **Running title: Shape analysis of gamma rhythm**

5

6 **Authors:** R (first name) Krishnakumaran (last name)<sup>1</sup>, Mohammed (first name) Raees (last  
7 name)<sup>2</sup> and Supratim (first name) Ray (last name)<sup>1,2,\*</sup>.

8 **Affiliations:**

9 <sup>1</sup>IISc Mathematics Initiative, Department of Mathematics, Indian Institute of Science,  
10 Bangalore, India, 560012

11 <sup>2</sup>Centre for Neuroscience, Indian Institute of Science, Bangalore, India, 560012,  
12 Telephone +91 80 2293 3437, Facsimile +91 80 2360 3323

13

14 \***Corresponding Author:** [sray@iisc.ac.in](mailto:sray@iisc.ac.in)

15

16 **Keywords:** Gamma, Harmonics, Wilson-Cowan model, Phase analysis

17 **Conflict of interest:** The authors declare no competing financial interests.

18 **Funding Disclosure:** This work was supported by Wellcome Trust/DBT India Alliance  
19 (Senior fellowship IA/S/18/2/504003 to SR) and DBT-IISc Partnership Programme.

20 **Acknowledgements:** We thank Dr. Adam Kohn for his helpful comments on the paper.

21

## 22 **Abstract**

23           Visual inspection of stimulus-induced gamma oscillations (30-70 Hz) often reveals a  
24 non-sinusoidal shape. Such distortions are a hallmark of non-linear systems and are also  
25 observed in mean-field models of gamma oscillations. A thorough characterization of the shape  
26 of the gamma cycle can therefore provide additional constraints on the operating regime of  
27 such models. However, the gamma waveform has not been quantitatively characterized,  
28 partially because the first harmonic of gamma, which arises because of the non-sinusoidal  
29 nature of the signal, is typically weak and gets masked due to a broadband increase in power  
30 related to spiking. To address this, we recorded spikes and local field potential (LFP) from the  
31 primary visual cortex (V1) of two awake female macaques while presenting full-field gratings  
32 or iso-luminant chromatic hues that produced huge gamma oscillations with prominent peaks  
33 at harmonic frequencies in the power spectra. We found that gamma and its first harmonic  
34 always maintained a specific phase relationship, resulting in a distinctive shape with a sharp  
35 trough and a shallow peak. Interestingly, a Wilson-Cowan (WC) model operating in an  
36 inhibition stabilized mode could replicate the findings, but only when the inhibitory population  
37 operated in the super-linear regime, as predicted recently. However, another recently developed  
38 model of gamma that operates in a linear regime driven by stochastic noise failed to produce  
39 salient harmonics or the observed shape. Our results impose additional constraints on models  
40 that generate gamma oscillations and their operating regimes.

41

42

43 **Significance Statement**

44           Gamma rhythm is not sinusoidal. Understanding these distortions could provide clues  
45 about the cortical network that generates the rhythm. Here, we use harmonic phase analysis to  
46 describe these waveforms quantitatively, and show that the gamma rhythm in macaque V1,  
47 during the presentation of fullscreen plain-hues and achromatic-gratings, has a signature arch-  
48 shaped waveform, despite the variation in power and frequency reported earlier. We further  
49 demonstrate using population rate models that the non-sinusoidal waveform is dependent on  
50 the operating domain of the system generating it. Consequently, shape analysis provides  
51 additional constraints on cortical models and their operating regimes.

52

## 53 **Introduction**

54           Gamma rhythm refers to oscillatory neural activity in the 30-70 Hz range that changes  
55 in response to different stimuli and cognitive states (Buzsaki, 2006). In the primary visual  
56 cortex (V1), the gamma rhythm has been studied extensively using achromatic gratings,  
57 wherein gamma power and center-frequency have been shown to vary systematically with the  
58 properties of the grating (Jia et al., 2013; Murty et al., 2018). For instance, peak-frequency of  
59 gamma increases with the contrast of gratings (Ray and Maunsell, 2010; Jia et al., 2013) and,  
60 gamma power increases and frequency decreases with stimulus size (Gieselmann and Thiele,  
61 2008; Ray and Maunsell, 2011). More recently, chromatic stimuli have also been explored,  
62 which, for low-wavelength (reddish) hues, can generate huge gamma oscillations that are an  
63 order of magnitude stronger than gamma produced by achromatic gratings (Shirhatti and Ray,  
64 2018; Bartoli et al., 2019; Peter et al., 2019).

65           Gamma oscillations are thought to reflect the push-pull activity of interconnected  
66 excitatory and inhibitory neurons, which has been demonstrated in different spiking network  
67 models (Tiesinga and Sejnowski, 2009; Mazzoni et al., 2015; Chariker et al., 2018; Keeley et  
68 al., 2019). However, since such large-scale network models have several parameters to be tuned  
69 and can become hard to interpret, simplified population rate models are often used. One  
70 pioneering model was proposed by Wilson and Cowan (WC; 1972), in which excitatory and  
71 inhibitory neurons were grouped into populations, and the dynamics of these populations were  
72 characterized. Variants of WC models have recently been used to explain some properties of  
73 the gamma rhythm. For example, based on the observation that gamma rhythm appears in short  
74 bursts and its phase does not vary linearly (Burns et al., 2010, 2011; Xing et al., 2012), a WC  
75 based model was proposed in which the activation function (input-output relationship) was  
76 linear but driven by Poisson noise (Kang et al., 2009; Xing et al., 2012). A variant of this model,  
77 in which an additional global excitatory population was added, was used to explain the stimulus

78 dependence of gamma oscillations (Jia et al., 2013). On the other hand, Jadi and Sejnowski  
79 (2014) used a WC model with a non-linear (sigmoidal) activation function and showed that  
80 constraining the model to operate in an inhibition stabilized mode (Tsodyks et al., 1997) and  
81 the inhibitory population to operate in superlinear domain can also reproduce the size and  
82 contrast dependence of gamma rhythm.

83         Although both these models can explain the stimulus dependence of gamma, the shape  
84 of the rhythm likely depends on the presence (and type) of non-linearity. The shape could be  
85 non-sinusoidal (see, for example, Figure 11 of Wilson and Cowan, 1972), which is represented  
86 in the spectral domain as peaks at harmonics of the fundamental frequency. Such distortions  
87 have been observed in various brain oscillations such as theta rhythm (for a review, see Cole  
88 and Voytek (2017)). For gamma rhythm, a visual inspection of raw traces reveals some  
89 distortion (Henrie and Shapley, 2005; Jia and Kohn, 2011; Jia et al., 2011; Ray and Maunsell,  
90 2015), which is also corroborated by the presence of peaks at the first harmonic of the  
91 fundamental gamma peak in the power spectra (Gieselmann and Thiele, 2008; Ray and  
92 Maunsell, 2010; Shirhatti and Ray, 2018). However, a quantitative study of the gamma  
93 waveform, which could potentially constrain the type and operating regime of models, has not  
94 been undertaken. This is partly because the noise in the harmonic range could offset its phase  
95 estimates if the harmonic is not prominent enough. To address this, we studied gamma  
96 oscillations produced by presenting full-screen hues that generated salient gamma oscillations  
97 with prominent harmonics (Shirhatti and Ray, 2018), characterized the shape, and tested  
98 models that could replicate the shape.

99

## 100 **Materials and Methods**

### 101 Data Acquisition

102 We used LFP data recorded by Shirhatti and Ray (2018) from V1 of two female  
103 macaque subjects, whom we refer to as M1 and M2 (correspond to M1 and M3 in the earlier  
104 paper). Both monkeys were fitted with a titanium headpost and trained to perform a visual  
105 passive fixation task, after which a Utah array (96 and 81 electrodes for M1 and M2) was  
106 implanted in V1 (details of the surgery and implants are provided in Shirhatti and Ray (2018)).  
107 The raw signals from microelectrodes were recorded using the 128-channel Cerebus neural  
108 signal processor (Blackrock Microsystems). LFP was obtained by filtering the raw signals  
109 online between 0.3 Hz and 500 Hz (Butterworth filters; first-order analog and fourth-order  
110 digital respectively), and recorded at 2 kHz sampling rate and 16-bit resolution. No further  
111 offline filtering was performed on this data before analysis.

112 Multiunit activity was also extracted from the raw signal by filtering online between  
113 250 Hz and 7.5 kHz (Butterworth filters; fourth-order digital and third-order analog  
114 respectively), and subjecting the resultant signal to an amplitude threshold of  $\sim 5$  SD of the  
115 signal. The recorded units were found to have receptive fields located in the lower left quadrant  
116 of the visual field with respect to fixation in both monkeys, at an eccentricity of  $\sim 3^\circ$ – $4.5^\circ$  in  
117 M1 and  $\sim 3.5^\circ$ – $4.5^\circ$  in M2. Full-field iso-luminant hues did not drive the neurons well, and  
118 therefore we did not get usable spiking activity from most electrodes. Therefore, as in our  
119 previous report (Shirhatti and Ray, 2018), all the analyses were performed only using LFP data  
120 (see Supplementary Figure 1 of Shirhatti and Ray, 2018, for description of spiking activity).

### 121 Experimental setup and behavior

122 During the experiment, the monkey was seated in a monkey chair with its head held  
123 stationary by the headpost. The monkey viewed a monitor (BenQ XL2411, LCD,  $1,280 \times 720$   
124 resolution, 100 Hz refresh rate) placed  $\sim 50$  cm from its eyes. The monkey and the display setup

125 were housed in a Faraday enclosure with a dedicated grounding separate from the main supply  
126 ground to provide isolation from external electrical noise. The monitor was calibrated and  
127 gamma-corrected using i1Display Pro (x-rite PANTONE) to obtain a mean luminance of 60  
128  $\text{cd/m}^2$  on its surface and to obtain a gamma of unity for each of the three primaries of the color  
129 gamut, which had the following CIE chromaticity xy coordinates: red, (0.644, 0.331); green,  
130 (0.327, 0.607); blue, (0.160, 0.062). The white point was at (0.345, 0.358).

131 Each monkey performed a passive fixation task, which required them to fixate at a small  
132 dot of  $0.05^\circ$ – $0.10^\circ$  radius at the center of the screen throughout the trial (3.3 or 4.8 s duration;  
133 fixation spot was displayed throughout). Each trial began with fixation, following which an  
134 initial blank grey screen of 1,000 ms was displayed, and then, two to three stimuli were shown  
135 for 800 ms each with an interstimulus interval of 700 ms. The monkey was rewarded with juice  
136 for maintaining fixation within  $2^\circ$  from the fixation point. Trials in which fixation was broken  
137 were not considered in our analyses. Eye position data was recorded as horizontal and vertical  
138 coordinates using the ETL-200 Primate Eye Tracking System (ISCAN) and monitored  
139 throughout the task using custom software running on macOS, which also controlled the task  
140 flow, generated stimuli, and randomized stimuli presentation.

#### 141 Stimuli

142 The stimuli consisted of 36 hues and 1 achromatic grating. The hues were equally  
143 spaced along the circular hue space of the standard HSV nomenclature ( $0^\circ$  hue to  $350^\circ$  hue,  
144 where  $0^\circ$ ,  $120^\circ$ , and  $240^\circ$  represent red, green, and blue respectively), which were displayed  
145 full screen and at full saturation and value. The achromatic grating was at an orientation of  $90^\circ$   
146 and had a spatial frequency of 4 cpd for M1 and 2 cpd for M2. These grating parameters were  
147 optimized to capture strong fast gamma with minimal slow gamma (see Murty et al., 2018).

148 The full-screen stimuli, in our setup, subtended a visual angle of  $\sim 56^\circ$  in the horizontal  
149 direction and  $\sim 33^\circ$  in the vertical direction.

#### 150 Electrode selection

151 As with our previous report (Shirhatti and Ray, 2018), electrodes were considered for  
152 analysis only if they gave consistent stimulus-induced changes and reliable receptive field  
153 estimates across sessions, determined by a receptive field mapping protocol that was run across  
154 multiple days (Dubey and Ray, 2019). Further, we discarded signals from electrodes with  
155 unusable or inconsistent signals, a high degree of crosstalk with other electrodes, or impedances  
156 outside the range of 250–2,500 K $\Omega$  for monkey M1 and 125–2,500 K $\Omega$  for M2. This resulted  
157 in 64 and 16 usable electrodes for M1 and M2, respectively.

#### 158 Data Analysis

159 Stimulus presentations with excessive artifacts ( $<5.9\%$  and  $<5.0\%$  of presentations of  
160 each stimulus in M1 and M2) were discarded for each session, yielding  $19.9 \pm 6.2$  repeats in M1  
161 and  $20.2 \pm 1.0$  repeats in M2 per stimulus.

#### 162 Spectral analysis of LFP

163 For each stimulus, LFP recorded from -500 to 0 ms from stimulus onset was taken as  
164 the ‘baseline period’ and 250 to 750 ms from stimulus onset was taken as the ‘stimulus period’  
165 to avoid the transient responses to the stimulus onset. This yielded a frequency resolution of 2  
166 Hz in the Power Spectral Density (PSD). PSD was computed using the Multitaper method  
167 using the Chronux toolbox (Bokil et al., 2010), with three tapers. The change in power was  
168 calculated as 10 times the difference between base-10 logarithm of PSDs at stimulus period  
169 and baseline period, expressed in decibels (dB). Estimation of peak frequencies was done on  
170 these baseline-corrected PSDs.



171 Gamma range was taken as 30-70 Hz, and ‘gamma peak frequency’ was estimated as  
172 the highest peak within this range. In most stimulus conditions tested, a discernible ‘second  
173 bump’ was observed in the baseline-corrected PSD. The peak frequency of the second bump  
174 was estimated as the highest peak occurring beyond 12 Hz after the estimated gamma peak  
175 frequency up to 140 Hz, to exclude higher frequency bumps.

#### 176 Analysis of gamma and harmonic phases

177 To compute the phase difference of gamma and its first harmonic, gamma and harmonic  
178 signals were extracted from LFP during the stimulus period by bandpass filtering using separate  
179 Butterworth filters (zero-phase; order 4). The passband for gamma was 20 Hz wide, centered  
180 around the gamma peak frequency, identified from trial-averaged PSD for a given stimulus and  
181 an electrode. The passband for the first harmonic of gamma was also 20 Hz wide but centered  
182 around twice the corresponding gamma peak frequency. The phases of these signals ( $\phi_{\text{gamma}}$   
183 and  $\phi_{\text{harmonic}}$ ) were then computed using Hilbert transform. The phase difference between  
184 gamma and its harmonic was calculated as:

$$185 \text{ Phase difference} = |2 * \phi_{\text{gamma}} - \phi_{\text{harmonic}}| \quad (1)$$

186 The above phase difference estimate was computed at each timepoint within the  
187 stimulus period of every trial for each electrode.

#### 188 Effect of harmonic phase on gamma waveform

189 To illustrate the effect of the gamma-harmonic phase relationship on the shape of  
190 gamma waveform, gamma and its first harmonic were mimicked using sinusoids and the initial  
191 phase of gamma ( $\phi_G$ ) was varied. The formulation of gamma and harmonics were as follows:

$$192 \text{ Gamma wave, } G = \cos(2\pi 45 t + \phi_G)$$

$$193 \text{ Harmonic wave, } H = \frac{1}{4} * \cos(2\pi 90 t)$$

194 Sum of gamma and harmonic =  $G + H$  (2)

195 These waveforms are displayed in Figure 4C along with the phase difference (Figure  
196 4D) obtained by applying equation (1).

### 197 Experimental Design and Statistical Analysis

198 First, we tested our hypothesis that the second bump in PSD accompanying gamma was  
199 indeed its harmonic by computing the ratio of harmonic to gamma peak-frequencies, obtained  
200 from the trial-averaged change in power (dB) from baseline spectra for each electrode. The  
201 ratios were subsequently subjected to a non-parametric Wilcoxon signed rank test (Null  
202 hypothesis: median ratio = 2). The standard error (SE) of the median of the gamma-harmonic  
203 frequency ratio was estimated by bootstrapping over N iterations (where N is the number of  
204 datapoints). This involved random sampling with replacement of the ratio data N times and  
205 estimating their median each time, which resulted in N medians, whose standard deviation (SD)  
206 is reported as the standard error (SE).

207 Circular statistics on the gamma-harmonic phase difference data were computed in  
208 Matlab using the Circular Statistics toolbox (Berens, 2009). The mean phase differences are  
209 reported as  $MEAN \pm CI$  in Figure 5, where MEAN is the circular mean and CI is the 95%  
210 confidence interval of MEAN, under a Von Mises distribution (implemented in *circ\_mean* and  
211 *circ\_confmean* functions of the Circular Statistics toolbox).

212 To validate that the distribution of gamma-harmonic phase differences was non-  
213 uniform and, thus, assess the validity of circular mean estimates in Figure 5, we subjected trial-  
214 averaged phase-differences gathered from all electrodes for a given stimulus to a Rayleigh test  
215 of non-uniformity (Null hypothesis: uniform distribution of phases). When the gamma activity  
216 recorded for a given stimulus has a specific waveform across electrodes, the corresponding

217 distribution of gamma-harmonic phase-differences will be unimodal. We considered this to be  
218 the case when the p-value of the Rayleigh test was less than 0.01.

### 219 Studying non-sinusoidal waveforms in mean-field models of gamma

220 To understand the factors resulting in the characteristic waveform of gamma, we  
221 investigated the gamma-harmonic phase relationship emerging in mean-field models  
222 introduced in earlier works, which produced gamma oscillations with power and frequency  
223 trends as observed in experiments. We explored the waveform in these models by identifying  
224 input regimes that produced a first-harmonic with a specific phase difference from the  
225 fundamental of gamma, as required for its arch-shape. We assessed the presence of such  
226 regimes in two models. The first model operated linearly and produced oscillations by virtue  
227 of stochastic time-varying inputs (Jia-Xing-Kohn or JXK model; Jia et al., 2013), while the  
228 second model had non-linear dynamics, which gave rise to gamma frequency limit cycles in  
229 response to constant inputs (Jadi and Sejnowski or JS model; Jadi and Sejnowski, 2014).

### 230 Jia-Xing-Kohn (JXK) model

231 Jia et al. (2013) defined a linear EI rate-model and extended it by adding a Global  
232 Excitatory Population (G) to approximate recurrent excitatory feedback within V1. The model,  
233 when subjected to step input, acts as a damped oscillator but produces oscillations by virtue of  
234 constant perturbation from the Poisson inputs. The original model, formulated in the paper,  
235 incorporates detailed stimulus descriptions, namely Masked Noise (MN) level and stimulus  
236 size ( $r$ ). The stimulus size parameter ( $r$ ) scales the extent of Network recurrence in steady-state  
237 proportionally as larger size stimuli excite a larger area of cortical cells, increasing the global  
238 feedback. In our simulations, the Masking Noise level (MN) has been set to 0, resulting in the  
239 following reduced formulation.

$$240 \tau_E \frac{dr_E}{dt} = -r_E + W_{EE}[r_E] - W_{EI}[r_I] + W_{EG}[r_G] + E_{inp}$$

$$241 \quad \tau_I \frac{dr_I}{dt} = -r_I + W_{IE}[r_E] - W_{II}[r_I] + W_{IG}[r_G] + I_{inp}$$

$$242 \quad \tau_G \frac{dr_G}{dt} = -r_G + r^2 \cdot W_{GE}[r_E]$$

243 where  $[x] = x$  if  $x > 0$  and 0 otherwise, and  $E_{inp}$  and  $I_{inp}$  approximate a Poisson process  
 244 with average rates IE and II respectively, which vary with stimulus contrast (c) as:

$$245 \quad I_E = 40 \cdot \frac{c^2}{c^2 + 0.3^2}; \quad I_I = 32 \cdot \frac{c^2}{c^2 + 0.3^2} \quad (3)$$

246 Parameter values of this model are given in Table 1.

### 247 Jadi-Sejnowski (JS) model

248 Jadi and Sejnowski (2014) used a simple rate model consisting of an excitatory and an  
 249 inhibitory population with sigmoidal activation, operating as an Inhibition Stabilized Network  
 250 (ISN) and constrained the input drives to the populations to reproduce the increase in power  
 251 and decrease in peak frequency of gamma with increasing stimulus size as earlier studies have  
 252 observed in V1 (Gieselmann and Thiele, 2008; Ray and Maunsell, 2011).

253 The model defines the population firing rates of Excitatory and Inhibitory populations  
 254 as follows:

$$255 \quad \tau_E \frac{dr_E}{dt} = -r_E + \sigma_E(W_{EE}r_E - W_{EI}r_I + I_E)$$

$$256 \quad \tau_I \frac{dr_I}{dt} = -r_I + \sigma_I(W_{IE}r_I - W_{II}r_I + I_I)$$

$$257 \quad \sigma_P(x) = \frac{1}{1 + \exp(m_P \cdot (\theta_P - x))} - \frac{1}{1 + \exp(m_P \cdot \theta_P)} \quad (4)$$

258 In this model, larger stimuli cause an increased inhibitory drive to the population, owing to  
 259 suppression from the surrounding populations. Since the model operated close to a supercritical  
 260 Hopf bifurcation, the amplitude and frequency of oscillations in firing rates could be closely

261 approximated by linearization of the model. The authors deduced and demonstrated that the  
262 model gave rise to the observed trends in the gamma when the inputs were such that the  
263 inhibitory population was strongly ‘superlinear’. This means that the summed inputs to the  
264 inhibitory population (from recurrent and external sources; argument of  $\sigma_1$  in equation 4) must  
265 lie in a certain range of values where the activation function  $\sigma_1$  curves upwards (increasing in  
266 slope with increasing summed input). For the sigmoidal activation function used in equation 4,  
267 the summed inputs must operate in the lower half of the sigmoid. Superlinear activation of the  
268 excitatory population, on the other hand, was antagonistic (not strongly superlinear). The set  
269 of such inputs constitute the operating regime of the model, which we refer to as the  
270 ‘superlinear’ regime.

#### 271 Identifying the operational input regimes using gamma-harmonic phase difference

272 Because the gamma-harmonic relationship was studied using LFP recordings in real  
273 data while the model simulations yielded firing rates of excitatory and inhibitory populations,  
274 these firing rates had to be converted to a ‘proxy’ LFP. The relationship between the two is  
275 complex (Hasenstaub et al., 2005; Einevoll et al., 2013; Mazzone et al., 2015). For simplicity,  
276 we used the negative sum of population firing rates of the excitatory and inhibitory populations  
277 in the models as a proxy for LFP, since the LFP, being the extracellular potential, could be  
278 approximated to vary inversely with the depolarization (excitability) of these populations. We  
279 also approximated the LFP as the negative of just the excitatory or inhibitory populations,  
280 which yielded qualitatively similar results. We elaborate this further in the Discussion section.

281 The environment used for simulation was Matlab 2019b (Mathworks,  
282 RRID:SCR\_001622), where the models were simulated by a forward Euler method, with  
283 parameters as in Table 1. Simulations were run for a duration of 2 seconds in time-steps of 0.1  
284 ms, on all pairs of 41 excitatory and 41 inhibitory input values sampled from the ranges  
285 specified in Table 1. In each case, PSD of the LFP proxy was computed between 1-2 seconds

286 to avoid the initial slow transient. The gamma and harmonic peak frequencies were identified  
287 as frequencies containing maximum power in the 30-70 Hz range and twice the gamma peak  
288 frequency, respectively. For further analyses in the JS model, only those input combinations  
289 were considered for which gamma and harmonic frequency amplitudes were greater than  $1e-3$   
290 and  $1e-6$  units respectively, to ensure phase analysis of oscillatory activity was not dominated  
291 by simulation errors or noise (grey region in Figure 7F). The LFP proxy signal was filtered  
292 using 20 Hz passbands centered at each frequency identified above. The gamma-harmonic  
293 phase difference (equation 1) was computed, just as for LFP in macaque data. An input point  
294 (pair of values supplied as excitatory and inhibitory input drives; stimulus parameters in the  
295 case of JXK) was said to be ‘in-regime’ if the gamma-harmonic phase difference was within  
296 22.5 degrees from 180-degrees (ideal for arch shape; Figure 4).

297 Since JXK takes stochastic inputs, to assess if there is indeed a unique gamma-harmonic phase  
298 difference at each of the mean input-drive combinations tested and whether the model can  
299 indeed exhibit in-regime behavior, we ran the simulation 50 times (analogous to 50 different  
300 trials) for each stimulus condition. In each iteration, we considered the mean phase-difference  
301 over the 1-2 second interval. For every selected input combination, the mean phase difference  
302 over this interval in each iteration was taken and the resultant pool of 50 mean phase differences  
303 was subjected to Rayleigh test of uniformity to identify those inputs that have a ‘consistent’  
304 gamma-harmonic phase relationship across iterations ( $p$ -value  $< 0.01$ ). Among the qualifying  
305 input combinations, those input drive pairs for which the circular mean of mean phase  
306 differences across iterations lay within  $180 \pm 22.5$  degrees were deemed to be ‘in-regime’. For  
307 JXK, the gamma-harmonic phase reported in Figure 6 is the circular average of the phase  
308 differences from all the iterations. The amplitudes of gamma and its first harmonic in the figure  
309 are estimated from the average PSD (examples in Figure 6C-D), computed as the mean of the  
310 PSDs obtained from 50 iterations for a given stimulus combination.

## 311 **Results**

312 We collected spikes and LFP from 96 and 81 electrodes from two monkeys, M1 and  
313 M2, while they viewed full-screen color patches of different hues. Limiting our analysis to  
314 electrodes with reliable estimates of RF centers (see “Electrode selection” section in Methods)  
315 yielded 64 and 16 electrodes from the two monkeys.

### 316 First harmonic of gamma oscillation

317 In Figure 1A-D, the top row shows the power spectral density (PSD; averaged across  
318 all trials and subsequently across all electrodes) of the LFP signal in subject M1 during baseline  
319 period (-500 to 0 ms from stimulus onset; black trace) and during stimulus period (250 to 750  
320 ms from stimulus onset; color/grey trace; the color indicates the hue that was presented and  
321 grey trace represents gratings). The corresponding change in power (dB) from baseline (Figure  
322 1A-D bottom row) shows a prominent peak in the gamma range, along with another prominent  
323 peak near twice the frequency. Figure 1E-H show the same plots from subject M2. We first  
324 tested whether this second peak was indeed at twice the frequency. For each electrode and  
325 stimulus, we measured the gamma peak frequency from trial-averaged baseline-corrected  
326 PSDs as the highest peak within the 30-70 Hz band, and the peak of the second bump as the  
327 highest peak occurring after 12 Hz past the identified gamma peak frequency but before 140  
328 Hz (the identified peaks are highlighted by black crosses in Figure 1).

329 Figure 2 presents the medians of the frequency ratios of second bump to gamma peak  
330 frequencies for each stimulus (hues indicated by color, gratings by grey color), computed  
331 across all electrodes in each subject, with error bars indicating the standard error of the median  
332 computed by bootstrapping. The stimuli are arranged along the horizontal axis by the average  
333 gamma power across electrodes. The frequency ratios were tightly clustered around 2,  
334 especially for stimuli that produced strong gamma oscillations. To test whether the ratio for a  
335 given stimulus was significantly different from 2, the frequency ratios computed in different

336 electrodes for the stimulus were subject to a Wilcoxon signed rank test. Stimuli for which the  
337 ratios were found to be significantly different from 2 ( $p < 0.01$ ) are indicated by open circles.  
338 Estimates of peak-frequency ratios for stimuli producing less gamma power were more  
339 susceptible to noise and showed larger deviations in frequency ratios. However, frequency  
340 ratios were distributed more narrowly around 2 for stimuli inducing stronger gamma. The  
341 median ratio value for M1 was  $2.00 \pm 0.021$ , not significantly different from 2 ( $p = 0.26$  for M1;  
342 Wilcoxon signed rank test). For M2, the median ratio was  $1.95 \pm 0.026$ , significantly different  
343 from 2 ( $p = 9.96e-6$ ; Wilcoxon signed rank test). However, note that because we computed  
344 PSDs over a 500 ms window, the frequency resolution was 2 Hz, which introduced some error  
345 in the estimated ratio. For example, if the true gamma and harmonic peaks are at 41 and 82 Hz,  
346 the estimated gamma will either be at 40 or 42 Hz, yielding a ratio of either  $82/40 = 2.05$  or  
347  $82/42 = 1.95$ . These margins of error are shown as dotted lines in Figure 2. Most of the points  
348 lay within these error margins, especially for electrodes with higher gamma power. When we  
349 restricted the analysis to the top ten hues for each monkey in terms of gamma power, the ratios  
350 were  $1.98 \pm 0.046$  ( $p=1$ ; Wilcoxon signed rank test) and  $1.99 \pm 0.014$  ( $p=0.38$ ; Wilcoxon signed  
351 rank test). These results confirm that the second peak was indeed the first harmonic of gamma.  
352 We also note that achromatic gratings failed to produce a salient harmonic in M2 (Figure 1H),  
353 yielding a ratio that was much less than 2 (Figure 2). Although the frequency ratios for  
354 achromatic gratings in most electrodes were concentrated near 1.5 (as indicated by the very  
355 small errorbars), a few electrodes (2 out of 16) gave ratios greater than 2, causing the Wilcoxon  
356 signed rank test to fail in rejecting the Null hypothesis (albeit with a small p-value of 0.042).

### 357 Shape of the gamma waveform

358 Figure 3 shows LFP traces from example trials corresponding to each stimulus case  
359 presented in Figure 1. These traces revealed a characteristic arch shape of gamma waveform,  
360 featuring narrower troughs separated by much broader crests, hinting at a characteristic



361 alignment of gamma fundamental and its harmonic in these cases (best observed in M2 when  
362 colored patches were shown).

363 To visualize how phase differences between gamma and its first harmonic components  
364 affected the shape of the summed signal, we added two sinusoids to emulate the fundamental  
365 and the first harmonic of gamma, at frequencies 45 Hz and 90 Hz respectively, and varied the  
366 initial phase of the 45Hz component (as described in equation 2; shown in Figure 4A). Figure  
367 4B shows the waveforms produced at each of these phases, and Figure 4C indicates the  
368 corresponding values of our phase difference measure (computed as in equation 1) between  
369 gamma and its harmonic. Using our convention (equation 1), a phase difference of 180 degrees  
370 (Figure 4A-C row 3) gave the desired shape as troughs of both sinusoids aligned to produce a  
371 steeper overall trough.

#### 372 Gamma waveform is similar in different hues

373 In Figure 5, we show the distribution of trial-averaged gamma-harmonic phase  
374 differences in all electrodes, for each stimulus (indicated by color), arranged horizontally in  
375 order of average gamma power produced. For each stimulus, the trial-averaged phase  
376 differences from all electrodes were subject to Rayleigh test, and the stimuli with non-uniform  
377 phase difference distributions (p-value < 0.01) are indicated by filled circles. The error bars in  
378 each case represent the 95% confidence interval of mean phase differences. The phase  
379 differences at higher gamma generating stimuli were distributed close to 180° in both subjects,  
380 as predicted from the arch-shaped waveforms (Figure 4). Stimuli that produced low power had  
381 high dispersion of phase differences, likely originating from higher influence of noise, as is  
382 visible from the larger confidence intervals in M1, resulting in some hues with nearly uniform  
383 phase difference distributions (unfilled circles; some cases lack error bars as confidence  
384 intervals could not be computed due to their near-uniform distributions). For hues that  
385 generated high gamma power, gamma-harmonic phase differences were concentrated slightly

386 higher than  $180^\circ$  for M1 and close to  $180^\circ$  for M2. The circular mean of electrode-averaged  
387 phase difference between gamma and its first harmonic across those stimuli which showed  
388 unimodal distribution (filled circles in Figure 5; 29 stimuli in M1 and all stimuli in M2) was  
389  $185.33 \pm 16.66$  degrees for M1 ( $176.60 \pm 16.32$  degrees if all stimuli were considered) and  
390  $153.90 \pm 5.56$  degrees for M2. When restricted to the ten hues with the highest gamma power  
391 for each monkey, the phases were  $206.02 \pm 4.65$  degrees for M1 and  $170.23 \pm 3.00$  degrees for  
392 M2.

### 393 Gamma waveform in a linear population rate model with stochastic inputs

394 To test whether the stereotypical gamma waveforms observed in the data could be  
395 modeled, we focused on two recently developed rate models by Jia, Xing and Kohn (2013;  
396 abbreviated as the JXK model) and Jadi and Sejnowski (2014; JS model), both of which can  
397 explain the contrast and size dependence of gamma oscillations (see Methods for details).

398 The JXK model, which is a piecewise linear model, operates as a damped oscillator in  
399 its linear domain and produces sustained oscillations by virtue of time-varying input drives  
400 generated by a Poisson process causing the responses to be stochastic as well. Hence, we  
401 simulated the model over 2 seconds repeatedly for 50 iterations and analyzed the interval from  
402 1-2 seconds ('analysis' window). Figure 6A shows the gamma peak amplitude obtained from  
403 the average PSD of the LFP proxy across iterations for each stimulus size and contrast; Figure  
404 6B shows the corresponding mean gamma peak frequencies. These plots show the model  
405 replicating the stimulus size/contrast effects on gamma as demonstrated by Jia et al. (2013):  
406 gamma frequency decreased and power increased as stimulus size increased, and gamma peak  
407 frequency increased when contrast increased. Figure 6C shows the average PSD from all  
408 iterations for different stimulus sizes ( $r$ ) at a fixed contrast ( $c$ ) of  $10^{-0.25}$ , showing a distinct  
409 bump of activity in gamma range, whose peak frequency decreases but peak power increases  
410 as we go from small to larger values of stimulus size ( $r$ ). Likewise, Figure 6D shows the average

411 PSD for different contrasts and a fixed size of 4.375. The gamma peak frequency in the LFP  
412 proxy increased with contrast as demonstrated by Jia et al. (2013). However, the gamma bumps  
413 were broad, as expected of a noisy pseudoperiodic signal, and no prominent harmonic band  
414 activity was discernible in the PSDs. We performed phase analysis, considering the activity in  
415 the band centered around twice the gamma peak frequency (Figure 6B) as the harmonic band  
416 activity. Figure 6E shows the harmonic amplitudes and Figure 6F shows the mean gamma-  
417 harmonic phase differences of LFP proxy traces from different iterations. We searched for  
418 stimulus size and contrasts which yielded arch-shaped gamma, or equivalently a gamma-  
419 harmonic phase differences close to 180 degrees (Figure 4C, middle) consistently across  
420 iterations. Such domains of inputs are shown by black contours in Figure 6F and are identified  
421 as ‘in-regime’ stimuli (see Methods; *Identifying the operational input regimes using gamma-*  
422 *harmonic phase difference*). Such regimes were few and scattered sparsely. An example LFP  
423 proxy trace for the highest contrast condition in Figure 6D, which was in-regime, is shown in  
424 Figure 6G. The top panel shows the LFP proxy trace and the bottom panel shows the gamma  
425 (blue) and harmonic (red) band signals. The LFP traces exhibited bursts of gamma oscillations  
426 with randomly distorted waveforms, with no consistent relationship between gamma and the  
427 harmonic.

#### 428 Gamma waveform in JS model

429 Jadi and Sejnowski (2014) simulated visually evoked gamma using a firing rate model  
430 with only an Excitatory and an Inhibitory population and demonstrated gamma as self-  
431 sustained oscillations in response to steady constant input drives. As a result, any waveform  
432 shape found in a cycle of the oscillations is repeated throughout. We studied whether this model  
433 could produce realistic gamma waveforms by identifying the input regime (pairs of input drives  
434 to Excitatory and Inhibitory population) that would give rise to gamma-harmonic phase  
435 difference around 180° in LFP.

436 We implemented the model with the parameters specified in Jadi and Sejnowski (2014)  
437 for different input drives as listed in Table 1, and computed the LFP proxy in each case. Figure  
438 7A-B shows the gamma peak amplitude and frequency respectively computed from the LFP  
439 proxy for each input-combination. The region within the white contour indicates an inhibition-  
440 stabilized network in which the inhibitory inputs are superlinear (for details, see Jadi and  
441 Sejnowski (2014)). Figure 7C shows the PSDs of LFP proxies obtained for different inhibitory  
442 input drives and a constant excitatory drive (input-combinations marked by same colored  
443 markers in Figures 7A-B), simulating the variation of stimulus size at a fixed contrast, as  
444 simulated in Jadi and Sejnowski (2014). The PSDs demonstrate the decrease in peak frequency  
445 and increase in power of gamma in our LFP proxy signal with increasing stimulus size. To  
446 demonstrate the contrast effect, we chose a set of input-combinations where both excitatory  
447 and inhibitory input drives linearly increased with contrast (colored markers in Figures 7A-B).  
448 The PSDs of LFP proxy generated for increasing contrasts are shown in Figure 7D. The gamma  
449 frequency increased for higher contrasts mimicking gamma in LFP recordings (Jia et al., 2013).  
450 Importantly, this model showed prominent harmonics as well.

451 Figure 7F plots the gamma-harmonic phase differences in the LFP proxy trace  
452 generated for each input combination. Regions in the input drives where the phase difference  
453 fell within  $22.5^\circ$  from  $180^\circ$  are enclosed by contours (Figure 7F, black contours) and identified  
454 as ‘in-regime’. Interestingly, this identified regimes fell inside the region predicted by Jadi and  
455 Sejnowski, (2014) where inhibition was superlinear (Figure 7F, white contours), and hence  
456 both validated their earlier findings and constrained the model to operate in more restricted  
457 regions. Figure 7G presents an example LFP proxy trace in the top panel, corresponding to the  
458 largest size condition in Figure 7C (in-regime), whose gamma fundamental (blue) and first  
459 harmonic (red) components are shown in the bottom panel. The troughs of gamma and  
460 harmonic were indeed aligned, adding up to a wider crest and a sharper trough overall.

461 Figure 8 shows the gamma-harmonic phase differences and regimes found in both the  
462 models when the activity of only one population was taken as the LFP proxy. Figure 8A show  
463 the phase differences in the JXK model using  $-rE$  as LFP proxy and Figure 8B shows the results  
464 using  $-rI$ . As before, no connected region of in-regime stimuli could be found (similar to the  
465 case in Figure 6F). Figure 8C-D show the phase differences found in the JS model using these  
466 LFP proxies. While the location and number of in-regime inputs identified were different, the  
467 superlinear regime was still found to contain a connected region of in-regime inputs in either  
468 case. This suggests that an LFP proxy chosen as any non-negative linear combination of  $-rE$   
469 and  $-rI$ , would give rise to ‘in-regime’ inputs within the superlinear regime of the JS model.

470

## 471 **Discussion**

472 We show quantitatively that gamma oscillations produced by different hues possess a  
473 distinctive arch-shaped waveform, which leads to a distinct peak at the first harmonic of gamma  
474 in the PSD, and a specific phase relationship between gamma and its harmonic. Further, we  
475 show that a linear, stochastically forced model proposed by Jia et al. (2013) does not produce  
476 distinct harmonics with consistent phase relationship and hence does not retain a specifically-  
477 shaped gamma waveform. On the other hand, a non-linear, self-oscillating model proposed by  
478 Jadi and Sejnowski (2014) produces prominent harmonics, and in a subdomain of inputs within  
479 the previously identified superlinear regime, the model generates the observed gamma  
480 waveform as well.

481 One important point to note is that this arch shaped gamma waveform with prominent  
482 harmonics were categorized for hue induced gamma, whereas most previous reports have used  
483 achromatic stimuli. In the achromatic stimulus used here, harmonics were not salient,  
484 especially for M2. However, although earlier experimental studies using achromatic gratings

485 did not describe or quantify the gamma waveform, visual inspection of raw LFP traces  
486 containing gamma bursts reveal a similar shape in some studies (Jia and Kohn, 2011, Fig. 2;  
487 Jia et al., 2011, Fig. 1A; Xing et al., 2012, Fig. 2; Brunet et al., 2014, Fig. 2D) showing that the  
488 arch-shape of gamma is observed for at least some achromatic stimuli. The arch shape  
489 described here is also visible when monkeys viewed colored natural images (Brunet et al.,  
490 2015, Fig. 2). Interestingly, some papers (Gieselmann and Thiele, 2008, Fig. 1; Jia et al., 2011,  
491 Fig. 9) have shown traces with an inverted arch shape. It is unclear why this is the case;  
492 potential reasons could be due to differences in the position of the reference wire, cortical depth  
493 of recording, or differences in the conductance level. For example, arch-shaped gamma  
494 waveform is observed in biophysical ING-PING and spiking models as well (Mazzoni et al.,  
495 2015, Fig. 4; Lowet et al., 2016, Fig. 4), in which non-sinusoidal gamma arises from the  
496 dynamics of the voltage-gated conductances, and the specific shape produced by the model  
497 varies when the conductances are varied. LFP waveform also changes with the recording depth  
498 (Figure 4B versus 4C of Mazzoni et al., 2015). Non-sinusoidal waveforms are common in  
499 neural rhythms, such as the sawtooth-shaped theta rhythm in the hippocampus and comb-  
500 shaped beta rhythm, arising from a variety of different biophysical phenomena (Cole and  
501 Voytek, 2017).

#### 502 Gamma oscillations in the JXK model

503 JXK model, like another model proposed by Kang and colleagues (Kang et al., 2010),  
504 explains the “bursty” nature of gamma oscillations, which was shown in previous studies  
505 (Burns et al., 2010; Xing et al., 2012). These studies observed that gamma band power varied  
506 during a trial, with short intervals (~130 ms) of high gamma power, interspersed by durations  
507 of no prominent power. Based on these, Xing et al. (2012) suggested that gamma rhythms were  
508 the outcome of cortical network resonating to the stochastic component in the inputs. During  
509 periods in a trial when stochastic variations in input are less, the cortical network would tend

510 to asymptotically stabilize and oscillations would get weaker over time. Xing et al. (2012)  
511 demonstrated this mechanism in a piecewise linear asymptotically stable model with noisy  
512 inputs. The JXK model (Jia et al., 2013) emulated gamma burst-activity exhibiting the observed  
513 dependencies of gamma power and frequency on stimulus parameters such as size and contrast  
514 by varying input drives and recurrent excitation to the neural populations. However, the JXK  
515 model does not produce a consistent waveform shape, because despite the presence of a  
516 rectification component, the model operates mostly in a linear (post-rectification) domain for  
517 all inputs simulated. In this domain the step response would be sinusoidal oscillations damping  
518 exponentially over time. Although the presence of Poisson inputs distorted the waveform and  
519 prolonged oscillations for a longer duration, these distortions are not consistent across different  
520 cycles of oscillation. This was reflected as wide band of activity around the gamma band in the  
521 PSD (Figure 6C-D), and a lack of discernible harmonic activity. Therefore, while these models  
522 adequately explained the bursty nature of gamma oscillations, it is not surprising that they  
523 failed to produce a specific gamma waveform.

524         However, a recent study has shown that the duration of gamma ‘burst’ activity reported  
525 in Xing et al. (2012) could have been underestimated (Chandran KS et al., 2017). This error  
526 arises because the spectral estimator that is used to compute gamma power is itself noisy,  
527 causing the rhythm to appear bursty in the spectral domain (see Chandran KS et al. (2017) for  
528 details). Chandran KS et al. (2017) used Matching Pursuit algorithm with a Gabor dictionary,  
529 which chooses the best-matching template to estimate the duration of a gamma burst in the  
530 time domain itself to show that gamma bursts during presentation of achromatic grating were  
531 longer than reported earlier (median of ~300 ms, although the mode was ~100 ms). Along with  
532 the results presented here, this suggests that the gamma rhythm could have more temporal  
533 regularity than what is predicted by these stochastic models.

534           However, we note that the non-sinusoidal nature of gamma rhythm described here could  
535 be introduced in the JXK model by changing the activation function. Specifically, if a non-  
536 linear activation function is used in the place of the piece-wise linear rectifier, the step response  
537 of the system would itself be a specific non-sinusoidal waveform in subsequent cycles of the  
538 resulting damped oscillation. When stochastic perturbations are added, the resultant bursts of  
539 oscillatory activity will contain both irregular distortions caused by the noisily fluctuating  
540 inputs and more regular distortions induced by non-linearity at specific parts of the trajectory  
541 in each cycle. Therefore, although we show that our results are more consistent with JS instead  
542 of the JXK model, it is possible that the JXK model with a suitable activation function can also  
543 replicate our findings. Indeed, while the JS model generates the proper gamma shape within a  
544 sub-regime, the duration of gamma is as long as the duration of the stimulus itself. Therefore,  
545 some stochasticity may be necessary to replicate all features of gamma rhythmicity, including  
546 duration and shape.

547           In the JXK model, there were a few inputs that qualified our phase-difference criteria  
548 for ‘in-regime’ behavior. However, a close examination of the ‘in-regime’ trace (example in  
549 Figure 6G) revealed that, in addition to the irregularly distorted gamma cycles, these inputs  
550 had occasional isolated steep troughs. These steep troughs could be approximated by a negative  
551 impulse, which could be decomposed as a series of sinusoids with their troughs aligned,  
552 resulting in sporadic 180-degree phase-difference estimates. Since these distortions are of  
553 lower frequency than gamma, the JXK model does not operate ‘in-regime’ for any input  
554 combination.

#### 555 Relationship between firing rates and LFP

556           JXK and JS models used excitatory cell activity to study the power and frequency trends  
557 of gamma. Here, we converted these firing rates to a “proxy” LFP to be compatible with the  
558 real data. Because the extracellular potential is generated due to the spatial separation of



559 transmembrane currents (generating dipoles or multi-poles), as well as alignment of such  
560 dipoles across neurons, LFPs are thought to mainly reflect the transmembrane currents of  
561 pyramidal neurons (Einevoll et al., 2013). But Hasenstaub et al. (2005), in their in-vivo study  
562 of ferret prefrontal cortex, found that the postsynaptic potentials and the firing of regular-  
563 spiking excitatory neurons and fast-spiking interneurons were both synchronized to the  
564 extracellular gamma rhythm, but the activation of interneurons was more aligned with the  
565 troughs of the oscillation. A modelling study (Mazzoni et al., 2015) simulated LFP using  
566 various outputs of a Leaky Integrate-and-Fire (LIF) network (such as firing rates, membrane  
567 potential and synaptic currents) and found that the sum of absolute values of synaptic currents  
568 (with both AMPA and GABA currents weighted nearly equally) served as the best proxy for  
569 LFP. As far as gamma oscillations are concerned, some studies have shown that spikes tend to  
570 occur just before the trough of gamma (Chalk et al., 2010; Vinck et al., 2010; Das and Ray,  
571 2018), with the pyramidal cells leading the interneurons by a few milliseconds (Csicsvari et  
572 al., 2003; Hasenstaub et al., 2005; Vinck et al., 2013). In the JS model as well, we found that  
573 the E population led the I population by about  $50^\circ$  or 2-3 ms in the superlinear regime. Further,  
574 the results were qualitatively similar when just E or I or the sum of both were used as the LFP  
575 proxy (Figure 7 and Figure 8).

#### 576 Gamma and Harmonics vs slow/fast gamma

577 Murty et al., (2018) showed that fullscreen achromatic gratings produced two different  
578 oscillations simultaneously – a fast gamma (40-70 Hz), which has been observed previously  
579 for smaller sized gratings, and a slow gamma (20-40 Hz) which is prominent only for large  
580 stimuli. Even though this also generates two bumps in the PSD, fast gamma is not a harmonic  
581 of the slow gamma. First, the center frequency of fast gamma was not twice that of slow  
582 gamma. Second, slow and fast gamma were not co-tuned: they had distinct orientation,  
583 contrast, temporal frequency and size tuning preferences.

584           The arch-shape shown here poses additional problems for phase coding schemes in  
585    which spike position relative to the gamma phase is used to code information (Fries et al., 2007;  
586    Vinck et al., 2010), because spikes tend to occur near the trough of the rhythm and having a  
587    sharper trough reduces the operating range. Other studies have proposed that gamma  
588    oscillations may not play a role but could be a useful marker/indicator of cortical processing  
589    (Ray and Maunsell, 2015). In that framework, properties such as shape and duration along with  
590    stimulus tuning could provide additional clues about the underlying circuitry.

591

592 References

- 593 Bartoli E, Bosking W, Chen Y, Li Y, Sheth SA, Beauchamp MS, Yoshor D, Foster BL  
594 (2019) Functionally Distinct Gamma Range Activity Revealed by Stimulus Tuning in  
595 Human Visual Cortex. *Curr Biol* 29:3345-3358.e7.
- 596 Berens P (2009) CircStat: A MATLAB Toolbox for Circular Statistics. *J Stat Softw* 31:1–21.
- 597 Bokil H, Andrews P, Kulkarni JE, Mehta S, Mitra PP (2010) Chronux: A platform for  
598 analyzing neural signals. *J Neurosci Methods* 192:146–151.
- 599 Brunet N, Bosman CA, Roberts M, Oostenveld R, Womelsdorf T, De Weerd P, Fries P  
600 (2015) Visual Cortical Gamma-Band Activity During Free Viewing of Natural  
601 Images. *Cereb Cortex* 25:918–926.
- 602 Brunet NM, Bosman CA, Vinck M, Roberts M, Oostenveld R, Desimone R, De Weerd P,  
603 Fries P (2014) Stimulus repetition modulates gamma-band synchronization in primate  
604 visual cortex. *Proc Natl Acad Sci U S A* 111:3626–3631.
- 605 Burns SP, Xing D, Shapley RM (2011) Is Gamma-Band Activity in the Local Field Potential  
606 of V1 Cortex a “Clock” or Filtered Noise? *J Neurosci* 31:9658–9664.
- 607 Burns SP, Xing D, Shelley MJ, Shapley RM (2010) Searching for auto coherence in the  
608 cortical network with a time-frequency analysis of the local field potential. *J Neurosci*  
609 *Off J Soc Neurosci* 30:4033–4047.
- 610 Buzsaki G (2006) *Rhythms of the brain*. Oxford University Press, USA.
- 611 Chalk M, Herrero JL, Gieselmann MA, Delicato LS, Gotthardt S, Thiele A (2010) Attention  
612 reduces stimulus-driven gamma frequency oscillations and spike field coherence in  
613 V1. *Neuron* 66:114–125.

- 614 Chandran KS S, Seelamantula CS, Ray S (2017) Duration analysis using matching pursuit  
615 algorithm reveals longer bouts of gamma rhythm. *J Neurophysiol* 119:808–821.
- 616 Chariker L, Shapley R, Young L-S (2018) Rhythm and Synchrony in a Cortical Network  
617 Model. *J Neurosci* 38:8621–8634.
- 618 Cole SR, Voytek B (2017) Brain Oscillations and the Importance of Waveform Shape.  
619 *Trends Cogn Sci* 21:137–149.
- 620 Csicsvari J, Jamieson B, Wise KD, Buzsáki G (2003) Mechanisms of Gamma Oscillations in  
621 the Hippocampus of the Behaving Rat. *Neuron* 37:311–322.
- 622 Das A, Ray S (2018) Effect of Stimulus Contrast and Visual Attention on Spike-Gamma  
623 Phase Relationship in Macaque Primary Visual Cortex. *Front Comput Neurosci* 12  
624 Available at: <https://www.frontiersin.org/articles/10.3389/fncom.2018.00066/full>  
625 [Accessed March 15, 2019].
- 626 Einevoll GT, Kayser C, Logothetis NK, Panzeri S (2013) Modelling and analysis of local  
627 field potentials for studying the function of cortical circuits. *Nat Rev Neurosci*  
628 14:770–785.
- 629 Fries P, Nikolić D, Singer W (2007) The gamma cycle. *Trends Neurosci* 30:309–316.
- 630 Gieselmann MA, Thiele A (2008) Comparison of spatial integration and surround  
631 suppression characteristics in spiking activity and the local field potential in macaque  
632 V1. *Eur J Neurosci* 28:447–459.
- 633 Hasenstaub A, Shu Y, Haider B, Kraushaar U, Duque A, McCormick DA (2005) Inhibitory  
634 Postsynaptic Potentials Carry Synchronized Frequency Information in Active Cortical  
635 Networks. *Neuron* 47:423–435.

- 636 Henrie JA, Shapley R (2005) LFP Power Spectra in V1 Cortex: The Graded Effect of  
637 Stimulus Contrast. *J Neurophysiol* 94:479–490.
- 638 Jadi MP, Sejnowski TJ (2014) Regulating Cortical Oscillations in an Inhibition-Stabilized  
639 Network. *Proc IEEE Inst Electr Electron Eng* 102.
- 640 Jia X, Kohn A (2011) Gamma rhythms in the brain. *PLoS Biol* 9:e1001045.
- 641 Jia X, Smith MA, Kohn A (2011) Stimulus Selectivity and Spatial Coherence of Gamma  
642 Components of the Local Field Potential. *J Neurosci* 31:9390–9403.
- 643 Jia X, Xing D, Kohn A (2013) No consistent relationship between gamma power and peak  
644 frequency in macaque primary visual cortex. *J Neurosci Off J Soc Neurosci* 33:17–25.
- 645 Kang K, Shelley M, Henrie JA, Shapley R (2009) LFP spectral peaks in V1 cortex: network  
646 resonance and cortico-cortical feedback. *J Comput Neurosci* Available at:  
647 [http://www.ncbi.nlm.nih.gov/entrez/query.fcgi?cmd=Retrieve&db=PubMed&dopt=Ci](http://www.ncbi.nlm.nih.gov/entrez/query.fcgi?cmd=Retrieve&db=PubMed&dopt=Citation&list_uids=19862612)  
648 [tation&list\\_uids=19862612](http://www.ncbi.nlm.nih.gov/entrez/query.fcgi?cmd=Retrieve&db=PubMed&dopt=Citation&list_uids=19862612).
- 649 Kang K, Shelley M, Henrie JA, Shapley R (2010) LFP spectral peaks in V1 cortex: network  
650 resonance and cortico-cortical feedback. *J Comput Neurosci* 29:495–507.
- 651 Keeley S, Byrne Á, Fenton A, Rinzel J (2019) Firing rate models for gamma oscillations. *J*  
652 *Neurophysiol* 121:2181–2190.
- 653 Lowet E, Roberts MJ, Bonizzi P, Karel J, Weerd PD (2016) Quantifying Neural Oscillatory  
654 Synchronization: A Comparison between Spectral Coherence and Phase-Locking  
655 Value Approaches. *PLOS ONE* 11:e0146443.

- 656 Mazzoni A, Lindén H, Cuntz H, Lansner A, Panzeri S, Einevoll GT (2015) Computing the  
657 Local Field Potential (LFP) from Integrate-and-Fire Network Models. *PLOS Comput*  
658 *Biol* 11:e1004584.
- 659 Murty DVPS, Shirhatti V, Ravishankar P, Ray S (2018) Large Visual Stimuli Induce Two  
660 Distinct Gamma Oscillations in Primate Visual Cortex. *J Neurosci Off J Soc Neurosci*  
661 38:2730–2744.
- 662 Peter A, Uran C, Klon-Lipok J, Roese R, van Stijn S, Barnes W, Dowdall JR, Singer W, Fries  
663 P, Vinck M (2019) Surface color and predictability determine contextual modulation  
664 of V1 firing and gamma oscillations Colgin L, ed. *eLife* 8:e42101.
- 665 Ray S, Maunsell JH (2011) Different origins of gamma rhythm and high-gamma activity in  
666 macaque visual cortex. *PLoS Biol* 9.
- 667 Ray S, Maunsell JHR (2010) Differences in Gamma Frequencies across Visual Cortex  
668 Restrict Their Possible Use in Computation. *Neuron* 67:885–896.
- 669 Ray S, Maunsell JHR (2015) Do gamma oscillations play a role in cerebral cortex? *Trends*  
670 *Cogn Sci* 19:78–85.
- 671 Shirhatti V, Ray S (2018) Long-wavelength (reddish) hues induce unusually large gamma  
672 oscillations in the primate primary visual cortex. *Proc Natl Acad Sci* 115:4489–4494.
- 673 Tiesinga P, Sejnowski TJ (2009) Cortical enlightenment: are attentional gamma oscillations  
674 driven by ING or PING? *Neuron* 63:727–732.
- 675 Tsodyks MV, Skaggs WE, Sejnowski TJ, McNaughton BL (1997) Paradoxical effects of  
676 external modulation of inhibitory interneurons. *J Neurosci Off J Soc Neurosci*  
677 17:4382–4388.

- 678 Veit J, Hakim R, Jadi MP, Sejnowski TJ, Adesnik H (2017) Cortical gamma band  
679 synchronization through somatostatin interneurons. *Nat Neurosci* 20:951–959.
- 680 Vinck M, Lima B, Womelsdorf T, Oostenveld R, Singer W, Neuenschwander S, Fries P  
681 (2010) Gamma-phase shifting in awake monkey visual cortex. *J Neurosci Off J Soc*  
682 *Neurosci* 30:1250–1257.
- 683 Vinck M, Womelsdorf T, Buffalo EA, Desimone R, Fries P (2013) Attentional Modulation of  
684 Cell-Class-Specific Gamma-Band Synchronization in Awake Monkey Area V4.  
685 *Neuron* 80:1077–1089.
- 686 Wilson HR, Cowan JD (1972) Excitatory and inhibitory interactions in localized populations  
687 of model neurons. *Biophys J* 12:1–24.
- 688 Xing D, Shen Y, Burns S, Yeh C-I, Shapley R, Li W (2012) Stochastic Generation of  
689 Gamma-Band Activity in Primary Visual Cortex of Awake and Anesthetized  
690 Monkeys. *J Neurosci* 32:13873–13880a.
- 691
- 692

693 **Figures**

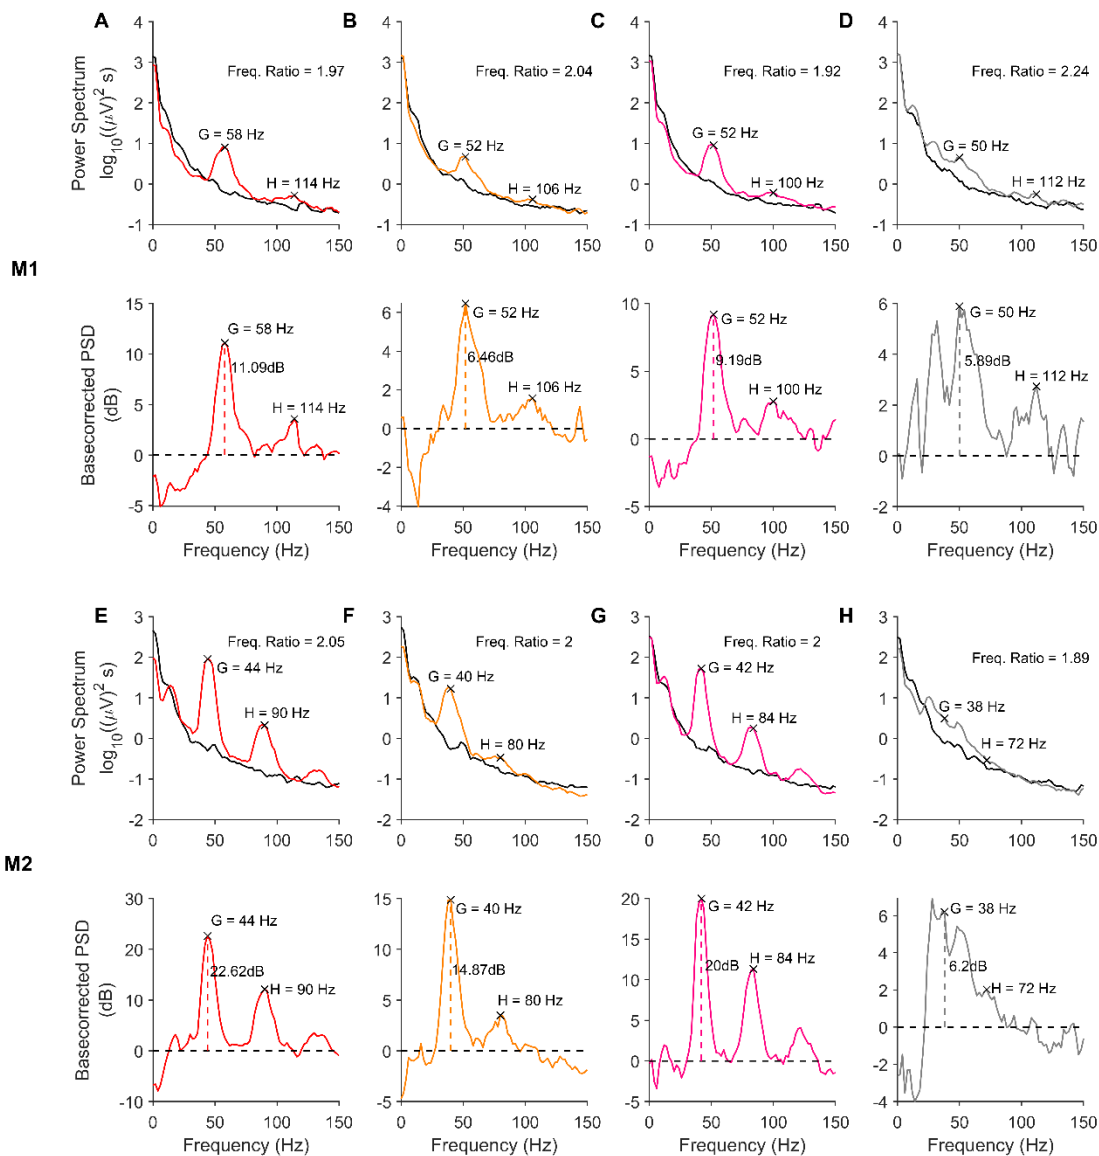

694

695 **Figure 1: Visual Stimulation induces narrowband activity in gamma and its harmonic**

696 **bands.** (A-D, *top row*) PSDs for baseline (-500 to 0 ms; 0 indicates stimulus onset) and

697 stimulus (250 to 750 ms) periods for different stimuli, averaged across trials and electrodes,

698 from monkey 1 (M1). The baseline PSDs are plotted in black, while the stimulus period PSDs

699 are colored (corresponding to the hue presented) or grey (for fullscreen grating). (A-D, *bottom*

700 *row*) show the change in power (dB) in the stimulus period from the baseline, computed from

701 the PSDs in the top row. The gamma power computed from the change in power spectrum is



702 represented by vertical dashed line). The peaks in gamma range and the second bump activity

703 are marked in each plot. (E-H) Same as A-D, for monkey M2.

704

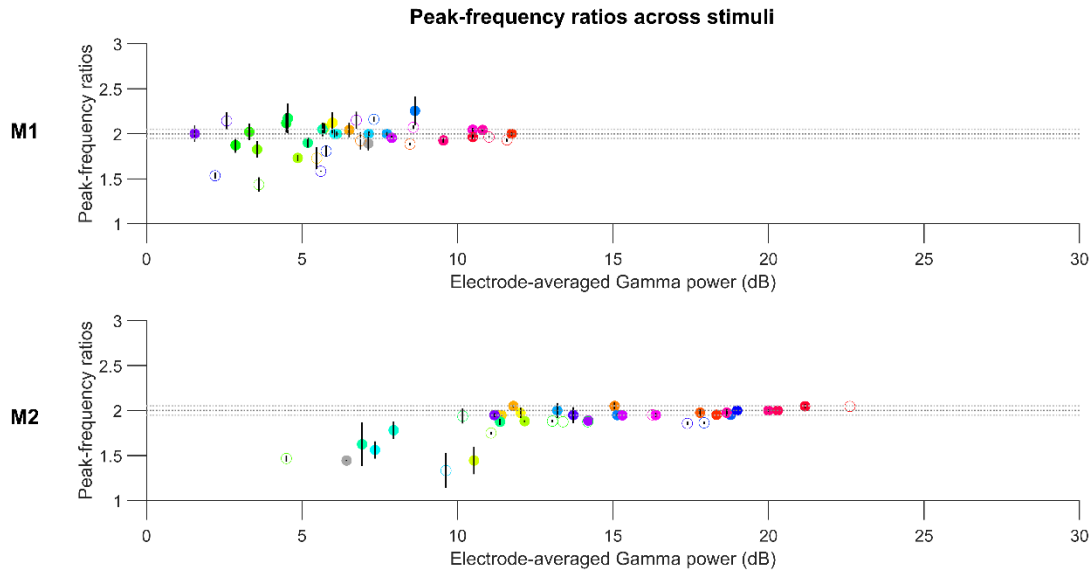

705

706 **Figure 2: Second bump in PSD corresponds to the first harmonic of gamma.** Median of

707 peak frequency ratios of the second bump with respect to the gamma band, scattered against

708 average gamma power for each stimulus (circles are colored to represent the presented hues;

709 grating stimulus is represented by the grey circle). Error bars indicate the standard error of

710 median (estimated by bootstrapping). Open circles mark stimuli whose ratios were found to be

711 significantly different from 2 ( $p$ -value  $< 0.01$  without any Bonferroni correction; Wilcoxon

712 signed-rank test). The dotted horizontal lines correspond to the least-error margin  $2 \pm 0.05$ .

713

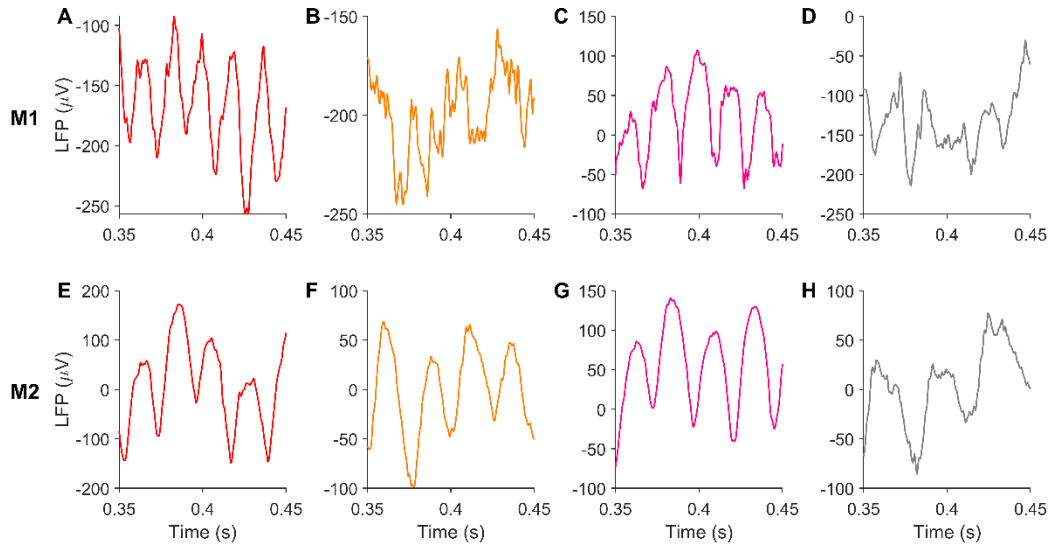

714

715 **Figure 3: Gamma waveform has consistent non-sinusoidal shape under different stimuli.**

716 (A-D) present LFP traces for different stimuli, shown in Figure 1, from an example trial and

717 electrode in M1. (E-H) shows LFP traces obtained from M2 for corresponding stimuli.

718

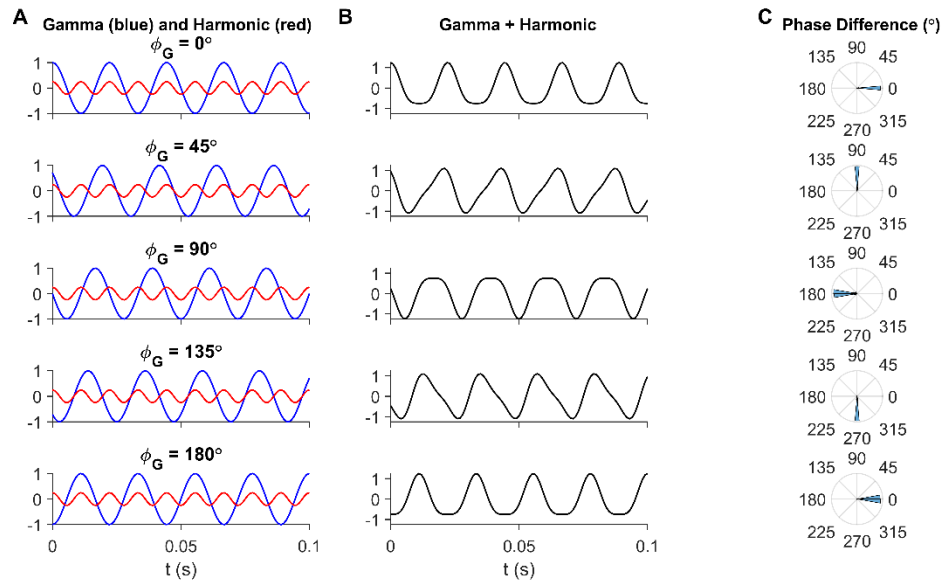

719

720 **Figure 4: Observed arch-shape of gamma corresponds to gamma-harmonic phase**

721 **difference of 180°.** (A) Gamma (blue) and harmonic (red) components, mimicked using

722 sinusoids as in equation (2) with different initial gamma phases ( $\phi_G$ ) in each row. (B) Gamma

723 waveform resulting from summation of gamma and its harmonic from the corresponding row

724 in (B). (C) Phase difference of gamma and its first harmonic, as given in equation (1), computed

725 from filtering and Hilbert transforming gamma and harmonic bands from the summed

726 waveform in (B) in each row. Note that the arch-shaped gamma observed in recordings arises

727 from a phase difference of 180° (middle row).

728

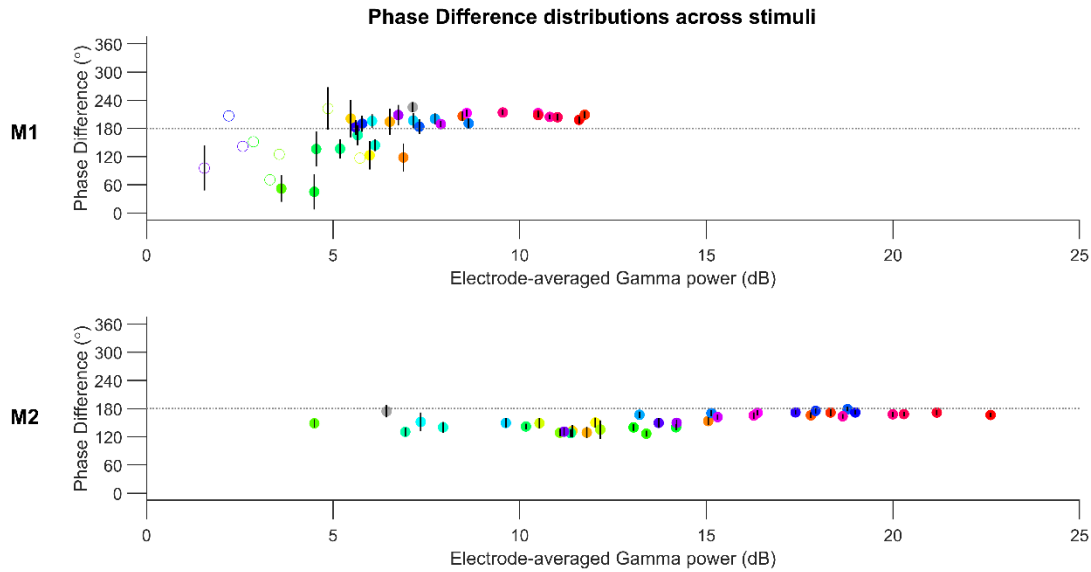

729

730 **Figure 5: Gamma-harmonic phase differences in different stimuli are concentrated near**  
731 **180°.** Circular mean of trial-averaged gamma-harmonic phase differences (across all  
732 electrodes) are scattered against the average gamma power for each stimulus (circles are  
733 colored to represent the presented hues; grey for grating stimulus). For each stimulus, the pool  
734 of trial-averaged phase differences from all electrodes is subject to Rayleigh test of non-  
735 uniformity to check if phase-difference is consistent across electrodes so that circular mean  
736 estimates are reliable ( $p$ -value  $< 0.01$ ). If found reliable (even though it could be different from  
737 180°), the stimulus is represented by a filled circle. Error bars represent the 95% confidence  
738 interval of circular mean.

739

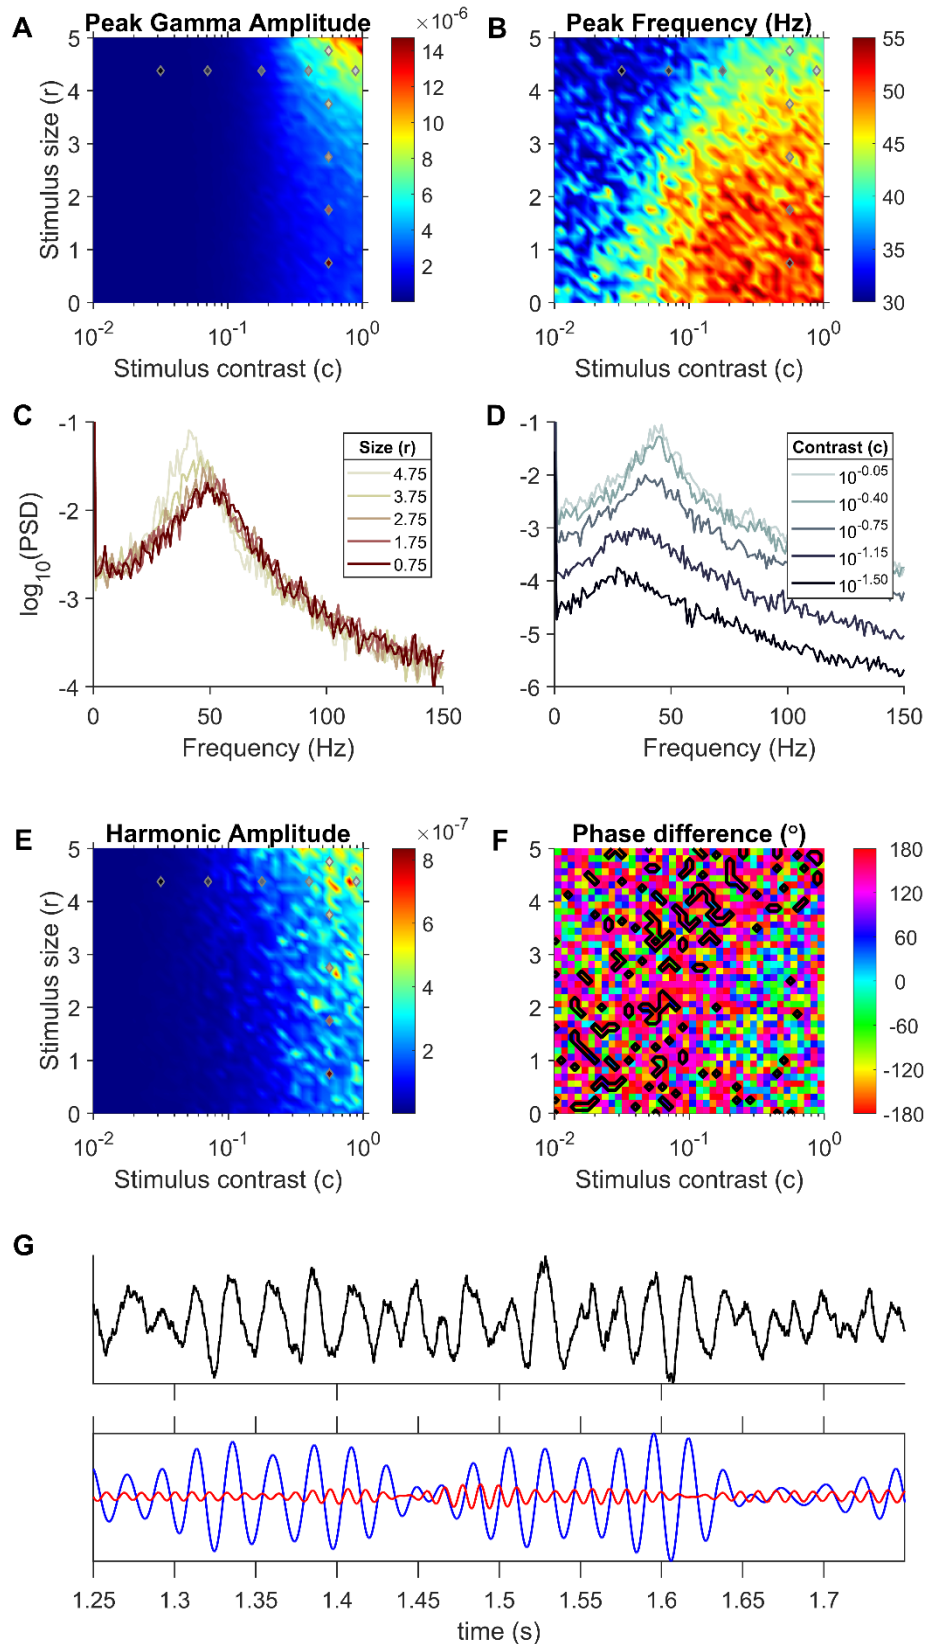

740

741 **Figure 6: Gamma properties for the JXK model** (A) Gamma peak amplitude and (B)  
742 frequency found in the average PSD from 50 iterations at each stimulus size (r) and contrast  
743 (c) combination. (C) Average PSD of LFP proxy traces generated at fixed contrast and different  
744 sizes, across all iterations. (D) Average PSD of LFP proxy traces generated at different  
745 contrasts at a fixed size. The stimuli values that generated these PSDs are indicated in plots  
746 (A), (B) and (E) using colored markers (same colors as the plots in C and D). (E) Harmonic  
747 band peak amplitude in the average PSD. The harmonic is taken to be twice of gamma  
748 frequency. (F) Mean gamma-harmonic phase difference (equation (1)) across multiple  
749 iterations, with in-regime inputs encircled by black contours. (G) Example LFP proxy activity  
750 (top panel) and its gamma and first harmonic components (bottom panel) generated at the  
751 highest contrast condition in (D) (identified as in-regime). This trace shows occasional steeper  
752 troughs (bottom trace; near 1.35 s, 1.52 s and 1.58 s timepoints) although there is no consistent  
753 trend between gamma and the harmonic.

754

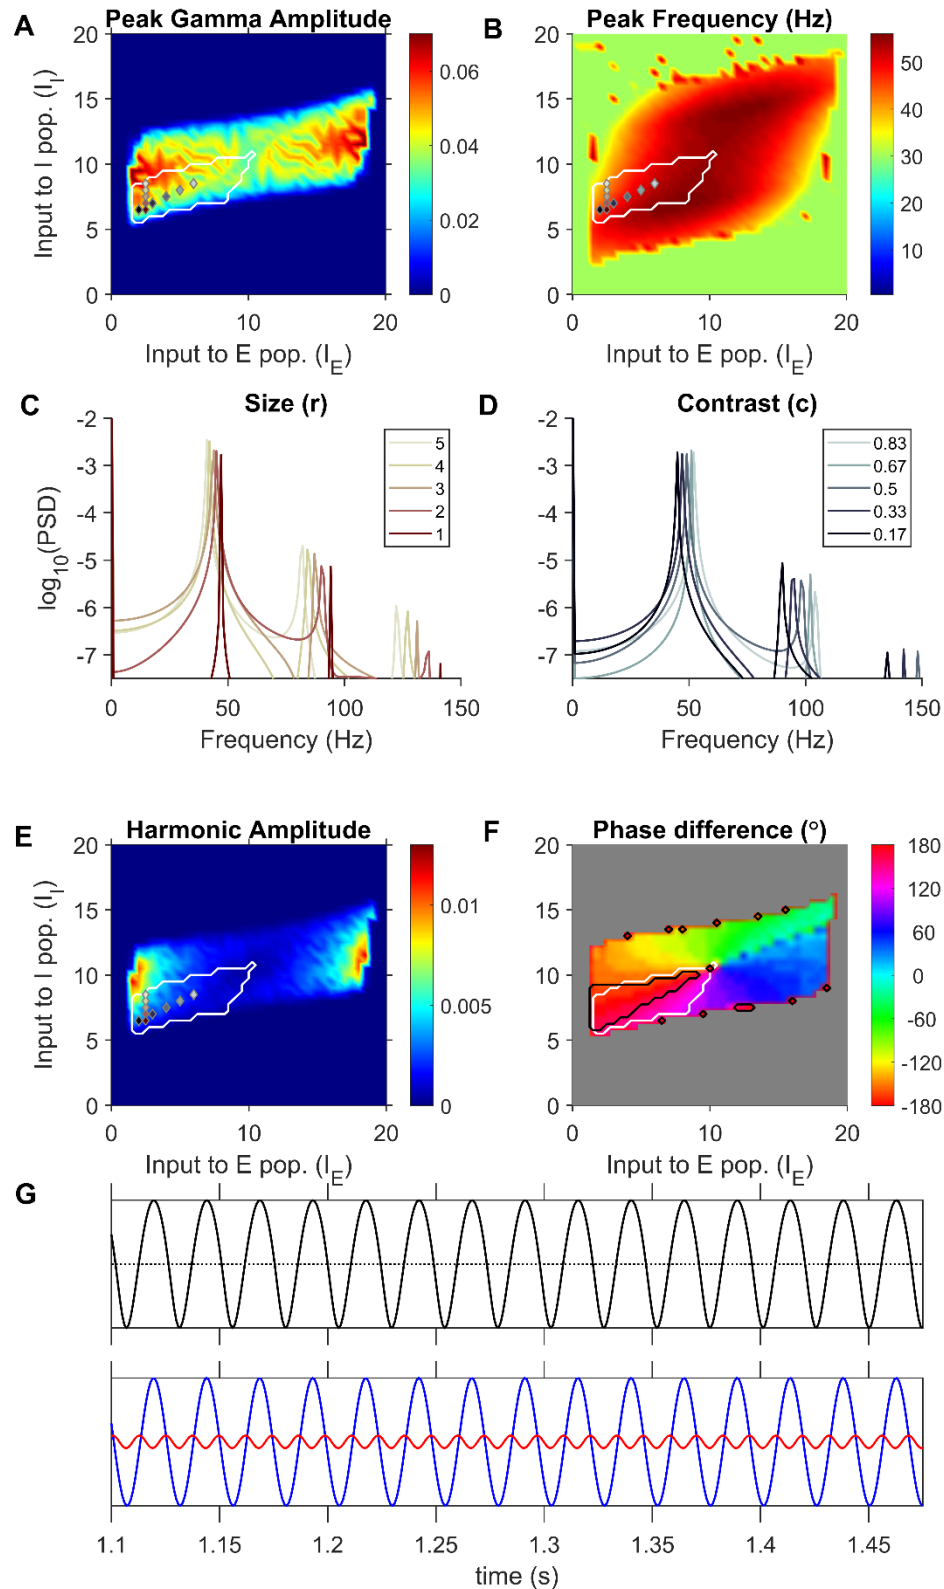

755

756 **Figure 7: JS model produces sustained arch-shaped gamma oscillations within the**  
757 **previously identified superlinear inhibitory regime. (A) Peak gamma amplitude and (B)**



758 Peak gamma frequency in the LFP proxy generated by the JS model for each input-drive  
759 combination. (C) PSD of LFP proxy generated for different stimulus sizes. (D) PSD of LFP  
760 proxy generated for different contrast. Input combinations used in (C) and (D) are indicated by  
761 markers, with same colors as traces, in (A), (B) and (E). (E) Harmonic amplitude identified  
762 from the PSD of LFP proxy for each stimulus condition. (F) Phase difference of gamma and  
763 its harmonic (equation (1)) computed for each simulated input drive pair. The black contours  
764 encircle input drives identified to be ‘in-regime’ from their phase differences. The white  
765 contour in each figure enclose the input domain identified by Jadi and Sejnowski (2014) to  
766 replicate gamma power increase and peak frequency decrease in response to increasing  
767 stimulus size, and it can be seen to enclose a significant portion of the  $180^\circ$  phase difference  
768 regime (black contour). (G) LFP proxy activity trace corresponding to the largest stimulus size  
769 shown in Figure 7C. The dotted horizontal line shown is equidistant from the minima and  
770 maxima of the traces. A sinusoidal oscillation would have the same crest and trough width on  
771 this line. The bottom panels show the gamma and its first-harmonic components, plotted in  
772 blue and red respectively, filtered from the LFP proxy traces.

773

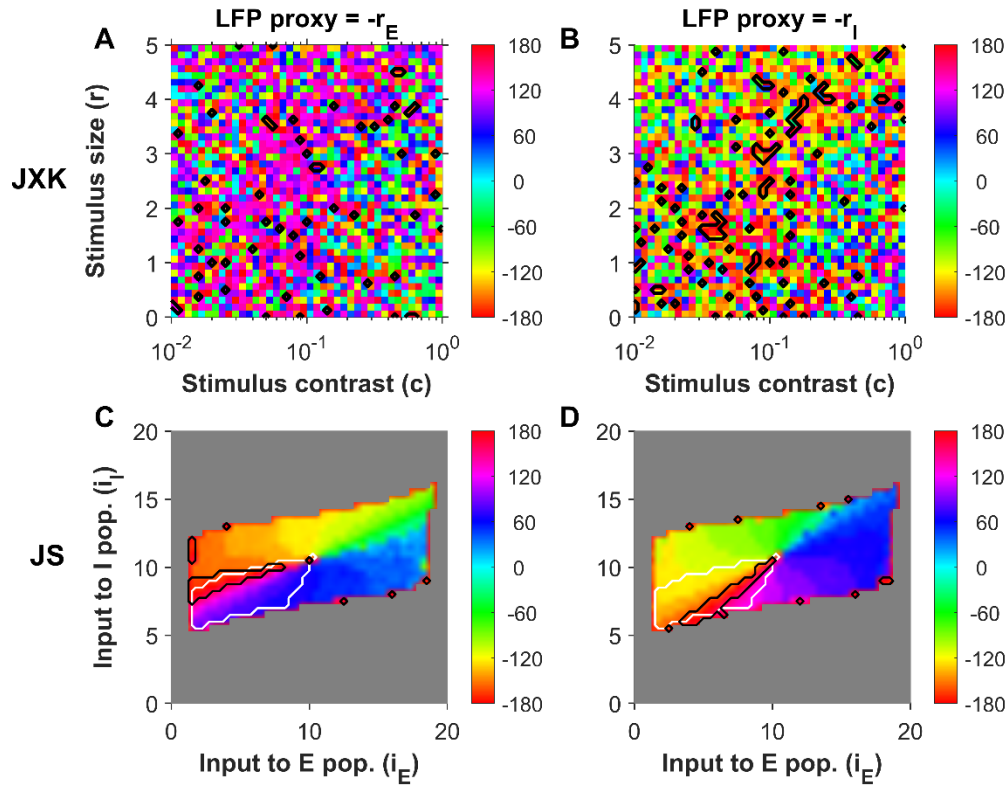

774

775 **Figure 8: Gamma-harmonic phase difference in rate models using different LFP proxies.**

776 (A) Phase difference of gamma and its harmonic in the JXK model computed for each stimulus

777 condition (as in Figure 6F) but using only E population activity to compute the LFP proxy. (B)

778 Gamma-harmonic phase differences in JXK using I population activity alone. (C) Phase

779 differences in JS model using E population activity only. (D) Phase differences in JS using I

780 population activity only. Black contours encircle stimulus conditions identified as ‘in-regime’.

781 White contours in (C) and (D) mark the superlinear regime of the JS model.

782

783 Tables:

784 **Table 1: Parameter values used in rate models.**

| <i>JS</i>  |                            |          |                                         |                       |          |          |                               |
|------------|----------------------------|----------|-----------------------------------------|-----------------------|----------|----------|-------------------------------|
| $W_{EE}$   | $W_{EI}$                   | $W_{IE}$ | $W_{II}$                                | $\tau_E, \tau_I$ (ms) |          |          |                               |
| 16         | 26                         | 20       | 1                                       | 20,10                 |          |          |                               |
| me,mi      | thetae,thetai              |          | $I_E, I_I$                              |                       |          |          |                               |
| 1,1        | 5,20                       |          | 0 to 20 (steps of 2.5)                  |                       |          |          |                               |
| <i>JJK</i> |                            |          |                                         |                       |          |          |                               |
| $W_{EE}$   | $W_{EI}$                   | $W_{IE}$ | $W_{II}$                                | $W_{EG}$              | $W_{IG}$ | $W_{GE}$ | $\tau_E, \tau_I, \tau_G$ (ms) |
| 1.5        | 3.25                       | 3.5      | 2.5                                     | 0.25                  | 0.5      | 0.6      | 6,15,19                       |
| MN         | r                          |          | c                                       |                       |          |          |                               |
| 0          | 1 to 5<br>(steps of 0.125) |          | 0.01 to 1<br>(logarithmic steps of 0.5) |                       |          |          |                               |

785
